# Supplementary material
Source: ML conference proceedings conference paper supplement (https://aclanthology.org/D13-1159)
Supplement: Attachment [file D13-1159.Attachment.zip]

## Supplementary Material

Table A.1: User study tasks (E: *knowledge-learning* tasks; S: *question-search* tasks)

| ID | Task Title                                                               | Category              | Main Entity         | Type |
|----|--------------------------------------------------------------------------|-----------------------|---------------------|------|
| 1  | Find the names of games running on macbook pro                           | Computer & Internet   | Macbook Pro         | E    |
| 2  | Find which components of thinkpad notebooks are usually asked            | Computer & Internet   | Thinkpad            | E    |
| 3  | How to ps body using photoshop cs2                                       | Computer & Internet   | Photoshop CS2       | E    |
| 4  | Questions about the best canon laser printer for a mac                   | Computer & Internet   | Laser printer       | S    |
| 5  | Questions about how to connect Xbox 360 to Laptop or PC using a router   | Computer & Internet   | Xbox 360            | S    |
| 6  | Questions about green screen problem of Windows Movie Maker              | Computer & Internet   | Windows Movie Maker | S    |
| 7  | Find the cities compared with Edinburgh                                  | Travel                | Edinburgh           | E    |
| 8  | Find the names of animals on myrtle beach                                | Travel                | Myrtle Beach        | E    |
| 9  | Find the names of cities in Portugal                                     | Travel                | Portugal            | E    |
| 10 | Questions about looking for good hostels in Madrid                       | Travel                | Madrid              | S    |
| 11 | Questions about how to get a low price ticket to Hong Kong Disneyland    | Travel                | Disneyland          | S    |
| 12 | Questions about how to go to Chinatown in Chicago                        | Travel                | Chicago             | S    |
| 13 | Find the brand of running shoes that users have asked                    | Sports                | Running shoes       | E    |
| 14 | Find football players that compared with messi                           | Sports                | Messi               | E    |
| 15 | Find the names of skiing places that users have asked                    | Sports                | Skiing              | E    |
| 16 | Questions asking horse racing website                                    | Sports                | Horse racing        | S    |
| 17 | Questions about who will win the MVP in NBA this year                    | Sports                | NBA                 | S    |
| 18 | Questions about when is the next match between Barcelona and Real Madrid | Sports                | Real Madrid         | S    |
| 19 | Find the brand of cars that have been compared with Toyota               | Cars & Transportation | Toyota              | E    |
| 20 | Which aspects of Jeep Wrangler have been asked                           | Cars & Transportation | Jeep Wrangler       | E    |
| 21 | Finding the names of sports cars being asked                             | Cars & Transportation | Sports cars         | E    |
| 22 | Questions which compare Mercedes Benz and BMW                            | Cars & Transportation | Mercedes Benz       | S    |
| 23 | Questions about the price to tow a suv from Newark to Florida            | Cars & Transportation | SUV                 | S    |
| 24 | Questions about How to reset the oil light for a 95 Honda civic          | Cars & Transportation | Honda Civic         | S    |

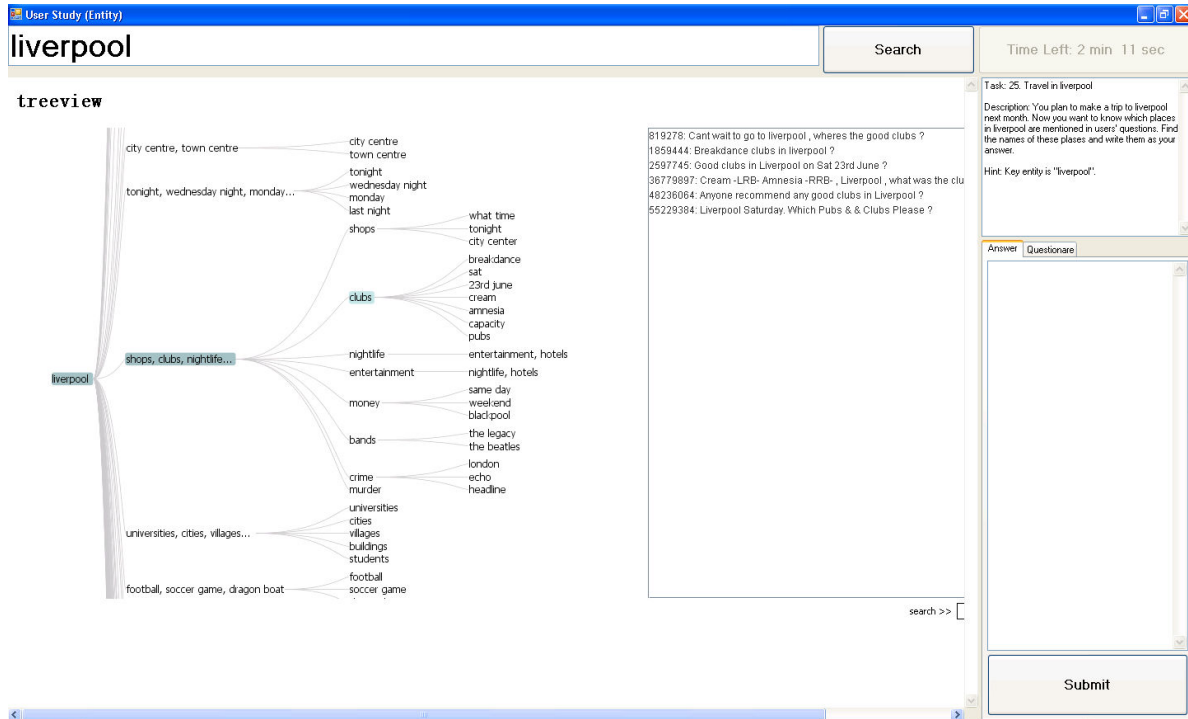

Figure A.1: The interface of CET-based program. The CET-based program works as follows. When the user types an entity name and clicks the search button, the corresponding CET with the searched entity as the root will be displayed. In each CET, we label each entity cluster with the top three most frequent entities. When the user clicks on one single-node cluster, the corresponding questions which contain the entity and its superior entities will be displayed in the right of CET. In every task, we allow 3 minutes to find information and fill in the answer in the answer panel. When a participant collects all she wants, she may click the submission button to enter the questionnaire part. If the participant fails to submit her answer within 3 minutes, the software will store the current answer, disable the submission button, and forcibly jump to the questionnaire part. After the participant finishes the questionnaire, the program provides the next task. When all tasks are finished, the program exits automatically. The list-based program follows the same process.
